# Supplementary material
Source: Springer Nature journal article supplement (http://www.springermedizin.de/resource/supplementary/12991_2013_1361_MOESM1_ESM.pdf/9613802)

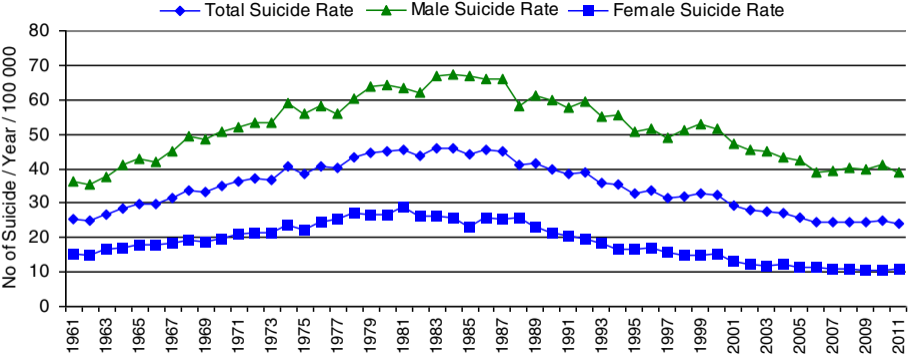

Supplement: MOESM1 [file 9613802]
